# Supplementary material for: First Experimental Quantitative Charge Density Studies of Advanced Intermediate of Vitamin D Analogues
Source: MDPI journal article supplement (doi:10.3390/molecules27061757), 2022-03-08
Supplement: s1 [file s1]

# Supporting Information

## First experimental quantitative charge density studies of advanced intermediate of vitamin D analogues

**Monika Wanat<sup>ab</sup>, Maura Malinska<sup>a</sup>, Andrzej Kutner<sup>c</sup> and Krzysztof Wozniak<sup>a\*</sup>**

<sup>a</sup>Biological and Chemical Research Centre, Department of Chemistry, University of Warsaw, 101  
Żwirki i Wigury, Warszawa, 02-089, Poland

<sup>b</sup>College of Inter-Faculty Individual Studies in Mathematics and Natural Sciences (MISMaP),  
University of Warsaw, 2C Stefana Banacha, Warszawa, 02-097, Poland

<sup>c</sup>Faculty of Pharmacy, Department of Bioanalysis and Drug Analysis, Medical University of Warsaw,  
1 Stefana Banacha, Warszawa, 02-097, Poland

Correspondence email: kwozniak@chem.uw.edu.pl

### List of content:

**Table S1** Critical points for selected bonds of analysed compounds.

**Table S2** Critical points for selected intermolecular interactions of analysed compounds.

**Figure S1** Residual density maps for analysed compounds.

**Figure S2** Deformation density maps for analysed compounds.

**Figure S3-S8** Energy frameworks for BNR-1 and Syn-1G.

**Figure S9** Selected motifs found in vitamin D analogues.

**Figure S10** Displacement ellipsoids of analysed molecular structures

**Table S1** Critical points for selected bonds of BNR-1, PRI-1730, PRI-1731 and 1,25(OH)<sub>2</sub>D<sub>3</sub>.

| C1-O1   | Gcp     | Vcp      | Gcp    | Vcp      | DIST12 | DCP1   | DCP2   | DEN     | LAPLACI | AN 3_HES | SIAN_EIG | EN-VALUES | ELLIPT | IC TYPE |
|---------|---------|----------|--------|----------|--------|--------|--------|---------|---------|----------|----------|-----------|--------|---------|
| BNR-1   | 0.24362 | -0.60736 | 639.61 | -1594.62 | 1.4328 | 0.8302 | 0.6027 | 1.82156 | -11.58  | -13.901  | -12.571  | 14.893    | 0.1058 | (3,-1)  |
| HIJFAH  | 0.22677 | -0.58022 | 595.37 | -1523.36 | 1.4099 | 0.836  | 0.5762 | 1.7791  | -12.212 | -13.217  | -12.784  | 13.789    | 0.0338 | (3,-1)  |
| PRI1730 | 0.22565 | -0.57869 | 592.45 | -1519.35 | 1.4092 | 0.836  | 0.5751 | 1.77688 | -12.28  | -13.113  | -12.867  | 13.701    | 0.0191 | (3,-1)  |
| PRI1731 | 0.22236 | -0.55791 | 583.82 | -1464.8  | 1.4265 | 0.8352 | 0.5924 | 1.73272 | -10.91  | -12.791  | -12.49   | 14.37     | 0.0241 | (3,-1)  |
|         |         |          |        |          |        |        |        |         |         |          |          |           |        |         |
| C3-O3   | Gcp     | Vcp      | Gcp    | Vcp      | DIST12 | DCP1   | DCP2   | DEN     | LAPLACI | AN 3_HES | SIAN_EIG | EN-VALUES | ELLIPT | IC TYPE |
| BNR-1   | 0.20013 | -0.52981 | 525.43 | -1391.02 | 1.4331 | 0.8554 | 0.5778 | 1.69289 | -12.489 | -12.315  | -12.29   | 12.116    | 0.002  | (3,-1)  |
| HIJFAH  | 0.22575 | -0.58181 | 592.71 | -1527.55 | 1.4092 | 0.5749 | 0.8363 | 1.78389 | -12.561 | -13.259  | -12.87   | 13.568    | 0.0302 | (3,-1)  |
| PRI1730 | 0.22302 | -0.56465 | 585.55 | -1482.48 | 1.4229 | 0.8368 | 0.5883 | 1.74758 | -11.433 | -12.991  | -12.601  | 14.16     | 0.0309 | (3,-1)  |
| PRI1731 | 0.22575 | -0.5642  | 592.72 | -1481.31 | 1.4224 | 0.5893 | 0.8343 | 1.74339 | -10.863 | -12.766  | -12.451  | 14.354    | 0.0253 | (3,-1)  |
|         |         |          |        |          |        |        |        |         |         |          |          |           |        |         |
| CX-C19  | Gcp     | Vcp      | Gcp    | Vcp      | DIST12 | DCP1   | DCP2   | DEN     | LAPLACI | AN 3_HES | SIAN_EIG | EN-VALUES | ELLIPT | IC TYPE |
| BNR-1   | 0.32956 | -0.88515 | 865.26 | -2323.97 | 1.3399 | 0.6808 | 0.6591 | 2.308   | -21.788 | -16.789  | -14.222  | 9.222     | 0.1805 | (3,-1)  |
| HIJFAH  | 0.3167  | -0.8474  | 831.5  | -2224.84 | 1.3386 | 0.6494 | 0.6892 | 2.24724 | -20.628 | -16.728  | -13.459  | 9.558     | 0.2429 | (3,-1)  |
| PRI1730 | 0.31959 | -0.85963 | 839.07 | -2256.97 | 1.3312 | 0.6444 | 0.6869 | 2.2683  | -21.251 | -16.92   | -13.642  | 9.311     | 0.2403 | (3,-1)  |
| PRI1731 | 0.3151  | -0.84176 | 827.29 | -2210.03 | 1.3416 | 0.6511 | 0.6905 | 2.23776 | -20.394 | -16.646  | -13.387  | 9.639     | 0.2434 | (3,-1)  |
|         |         |          |        |          |        |        |        |         |         |          |          |           |        |         |
| C5-C6   | Gcp     | Vcp      | Gcp    | Vcp      | DIST12 | DCP1   | DCP2   | DEN     | LAPLACI | AN 3_HES | SIAN_EIG | EN-VALUES | ELLIPT | IC TYPE |
| BNR-1   | 0.31891 | -0.87954 | 837.3  | -2309.23 | 1.3527 | 0.6815 | 0.6713 | 2.30744 | -23.3   | -18.111  | -14.596  | 9.407     | 0.2408 | (3,-1)  |
| HIJFAH  | 0.30853 | -0.83921 | 810.04 | -2203.33 | 1.3402 | 0.6675 | 0.6728 | 2.2392  | -21.414 | -16.615  | -13.88   | 9.081     | 0.197  | (3,-1)  |
| PRI1730 | 0.3031  | -0.81982 | 795.78 | -2152.44 | 1.3443 | 0.6769 | 0.6683 | 2.20635 | -20.593 | -16.221  | -13.643  | 9.272     | 0.189  | (3,-1)  |
| PRI1731 | 0.30239 | -0.81829 | 793.94 | -2148.43 | 1.3453 | 0.6697 | 0.6776 | 2.20401 | -20.581 | -16.249  | -13.621  | 9.289     | 0.193  | (3,-1)  |
|         |         |          |        |          |        |        |        |         |         |          |          |           |        |         |
| C6-C7   | Gcp     | Vcp      | Gcp    | Vcp      | DIST12 | DCP1   | DCP2   | DEN     | LAPLACI | AN 3_HES | SIAN_EIG | EN-VALUES | ELLIPT | IC TYPE |
| BNR-1   | 0.25979 | -0.66127 | 682.07 | -1736.17 | 1.4577 | 0.7281 | 0.7296 | 1.92284 | -13.659 | -14.146  | -11.454  | 11.941    | 0.2351 | (3,-1)  |
| HIJFAH  | 0.25757 | -0.65928 | 676.25 | -1730.94 | 1.4531 | 0.7272 | 0.7262 | 1.92093 | -13.895 | -13.914  | -11.322  | 11.341    | 0.229  | (3,-1)  |
| PRI1730 | 0.2579  | -0.66088 | 677.13 | -1735.15 | 1.4538 | 0.7268 | 0.7271 | 1.92404 | -13.985 | -13.94   | -11.36   | 11.314    | 0.2271 | (3,-1)  |
| PRI1731 | 0.25717 | -0.65795 | 675.21 | -1727.46 | 1.4554 | 0.7279 | 0.7277 | 1.91847 | -13.843 | -13.874  | -11.312  | 11.344    | 0.2265 | (3,-1)  |
|         |         |          |        |          |        |        |        |         |         |          |          |           |        |         |
| C7-C8   | Gcp     | Vcp      | Gcp    | Vcp      | DIST12 | DCP1   | DCP2   | DEN     | LAPLACI | AN 3_HES | SIAN_EIG | EN-VALUES | ELLIPT | IC TYPE |
| BNR-1   | 0.33522 | -0.8957  | 880.11 | -2351.67 | 1.3504 | 0.6972 | 0.6534 | 2.32281 | -21.715 | -17.808  | -13.898  | 9.991     | 0.2814 | (3,-1)  |
| HIJFAH  | 0.29899 | -0.80473 | 784.99 | -2112.82 | 1.3553 | 0.68   | 0.6764 | 2.18042 | -19.931 | -16.015  | -13.533  | 9.618     | 0.1834 | (3,-1)  |
| PRI1730 | 0.30644 | -0.83657 | 804.56 | -2196.42 | 1.3421 | 0.6697 | 0.6728 | 2.23608 | -21.563 | -16.688  | -13.969  | 9.095     | 0.1946 | (3,-1)  |
| PRI1731 | 0.30438 | -0.82868 | 799.16 | -2175.69 | 1.3482 | 0.6754 | 0.673  | 2.22257 | -21.198 | -16.589  | -13.848  | 9.239     | 0.1979 | (3,-1)  |

**Table S2** Critical points for selected intermolecular interactions of of BNR-1, PRI-1730, PRI-1731 and Syn-1G.

|         |                            | Gcp     | Vcp      | Gcp   | Vcp    | DIST12 | DCP1   | DCP2   | DEN     | LAPLACI | AN<br>3_HES | SIAN_EIG | EN-<br>VALUES | ELLIPT |
|---------|----------------------------|---------|----------|-------|--------|--------|--------|--------|---------|---------|-------------|----------|---------------|--------|
| PRI1730 | HB1 (O3...H1)              | 0.01942 | -0.01706 | 51    | -44.79 | 2.0002 | 1.2511 | 0.7492 | 0.14735 | 2.1     | -0.733      | -0.535   | 3.368         | 0.3711 |
|         | HB3 (O25...H3)             | 0.02816 | -0.03102 | 73.92 | -81.45 | 1.7965 | 1.1623 | 0.6343 | 0.24327 | 2.438   | -1.415      | -1.368   | 5.221         | 0.0342 |
|         | HB7<br>(O1...H22A)         | 0.03079 | -0.03474 | 80.85 | -91.22 | 1.7591 | 1.1445 | 0.6147 | 0.26343 | 2.587   | -1.581      | -1.568   | 5.736         | 0.0087 |
|         | Methylene<br>(H9A...H19A)  | 0.00538 | -0.00369 | 14.13 | -9.68  | 2.2071 | 1.0959 | 1.1173 | 0.04441 | 0.682   | -0.142      | -0.117   | 0.941         | 0.2142 |
|         | H11B...H19A                | 0.00212 | -0.00149 | 5.56  | -3.92  | 2.4918 | 1.2446 | 1.2602 | 0.02705 | 0.264   | -0.097      | -0.073   | 0.434         | 0.3196 |
|         | C19...H21C                 | 0.00115 | -0.00079 | 3.02  | -2.06  | 3.4302 | 1.977  | 1.4663 | 0.0175  | 0.146   | -0.033      | -0.021   | 0.2           | 0.586  |
|         | H16B...H19B                | 0.00422 | -0.00335 | 11.08 | -8.79  | 2.1793 | 1.0951 | 1.0911 | 0.05065 | 0.491   | -0.191      | -0.168   | 0.85          | 0.1374 |
|         |                            |         |          |       |        |        |        |        |         |         |             |          |               |        |
| PRI1731 | HB1 (H1...O3)              | 0.02053 | -0.01964 | 53.91 | -51.56 | 1.9472 | 0.7156 | 1.233  | 0.17053 | 2.065   | -0.891      | -0.765   | 3.721         | 0.1638 |
|         | HB2 (H25...O1)             | 0.0287  | -0.03285 | 75.36 | -86.26 | 1.7733 | 0.6227 | 1.1506 | 0.25647 | 2.367   | -1.53       | -1.523   | 5.419         | 0.0046 |
|         | HB3<br>(O25...H3A)         | 0.02934 | -0.03364 | 77.03 | -88.33 | 1.769  | 1.1509 | 0.6182 | 0.26036 | 2.413   | -1.571      | -1.556   | 5.54          | 0.0092 |
|         | Methylene<br>(H19B...H18C) | 0.00306 | -0.0021  | 8.03  | -5.51  | 2.4751 | 1.2132 | 1.2748 | 0.03173 | 0.387   | -0.101      | -0.07    | 0.559         | 0.4409 |
|         | H19B...H12B                | 0.00394 | -0.00273 | 10.33 | -7.16  | 2.3199 | 1.2176 | 1.1507 | 0.0378  | 0.496   | -0.138      | -0.078   | 0.712         | 0.774  |
|         | H19A...H23                 | 0.00136 | -0.00082 | 3.58  | -2.15  | 2.8001 | 1.4273 | 1.411  | 0.01364 | 0.184   | -0.041      | -0.024   | 0.249         | 0.6825 |
|         | H19B...H20                 | 0.00348 | -0.00243 | 9.14  | -6.37  | 2.3734 | 1.2174 | 1.1656 | 0.03547 | 0.437   | -0.131      | -0.097   | 0.666         | 0.3456 |
|         | H15A...H22                 | 0.00101 | -0.00062 | 2.65  | -1.62  | 2.8689 | 1.4462 | 1.4341 | 0.01192 | 0.135   | -0.033      | -0.027   | 0.195         | 0.1869 |
| BNR-1   |                            |         |          |       |        |        |        |        |         |         |             |          |               |        |
| dimer 1 | Methylene<br>(H19A...H33C) | 0.00182 | -0.00232 | 4.79  | -6.1   | 2.6088 | 1.3271 | 1.2923 | 0.05478 | 0.128   | -0.202      | -0.199   | 0.529         | 0.0132 |
|         | H19B...O2                  | 0.00451 | -0.00347 | 11.85 | -9.11  | 2.6244 | 1.0945 | 1.5328 | 0.04997 | 0.536   | -0.173      | -0.146   | 0.855         | 0.1871 |
| dimer 2 | C21...C11                  | 0.00398 | -0.0027  | 10.45 | -7.08  | 2.3275 | 1.221  | 1.1159 | 0.03612 | 0.508   | -0.136      | -0.08    | 0.724         | 0.6959 |
|         | C4...C11                   | 0.00351 | -0.00213 | 9.22  | -5.59  | 2.3594 | 1.1673 | 1.2072 | 0.02459 | 0.472   | -0.103      | -0.031   | 0.606         | 2.3629 |
|         |                            |         |          |       |        |        |        |        |         |         |             |          |               |        |
| Syn-1G  |                            |         |          |       |        |        |        |        |         |         |             |          |               |        |
| dimer 3 | C15...C22<br>(H22A...H15B) | 0.00236 | -0.00146 | 6.2   | -3.83  | 2.3483 | 1.1831 | 1.1656 | 0.02063 | 0.315   | -0.089      | -0.055   | 0.459         | 0.6204 |

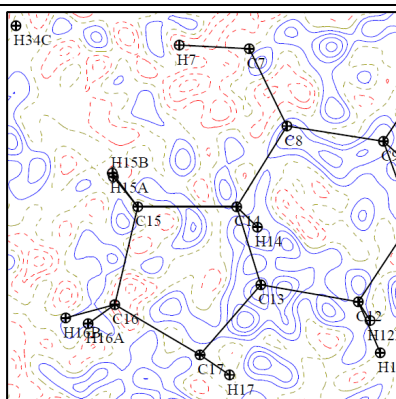

C15, C14, C16

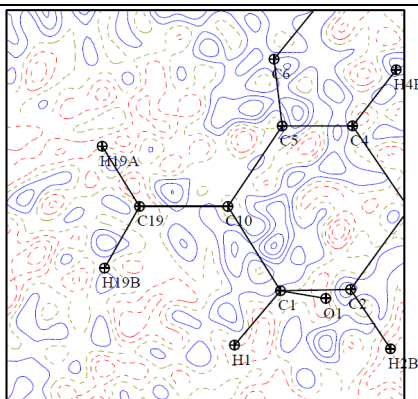

C19, C10, H19B

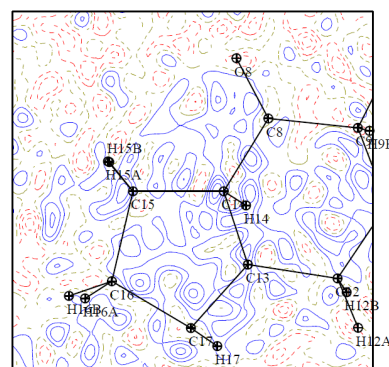

C15, C14, C16

**Syn1G**

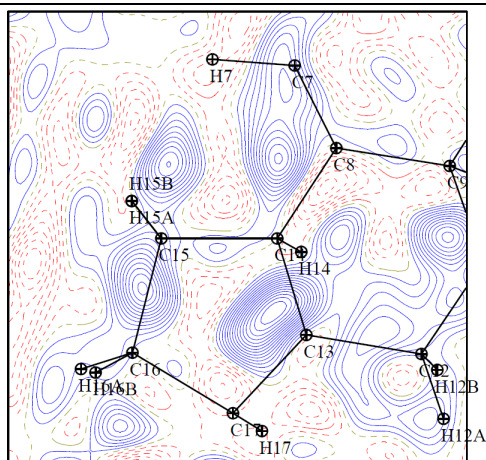

C15, C14, C16

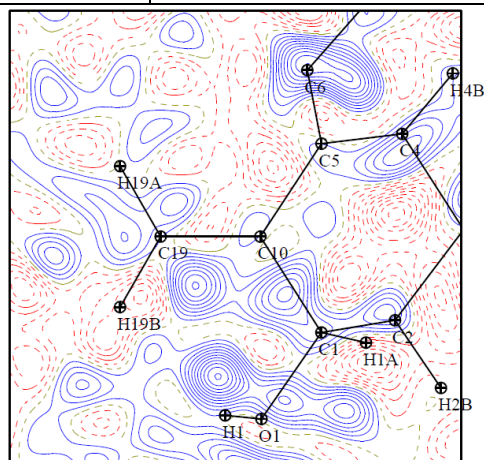

C19, C10, H19B

**PRI-1730**

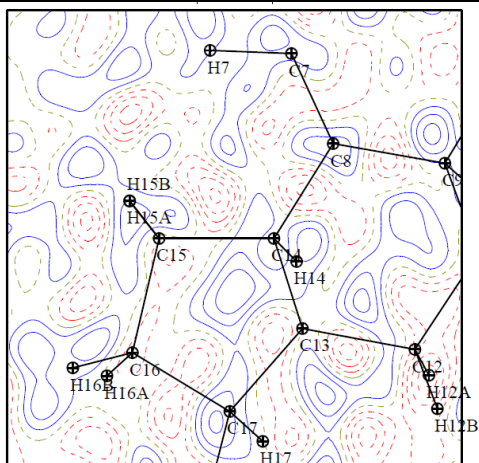

C15, C14, C16

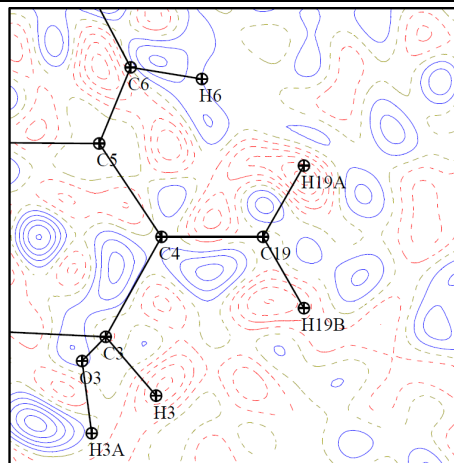

C19, C4, H19B

**PRI-1731**



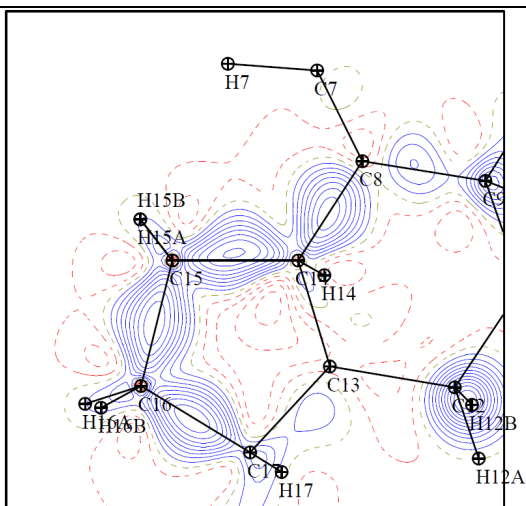

C15, C14, C16

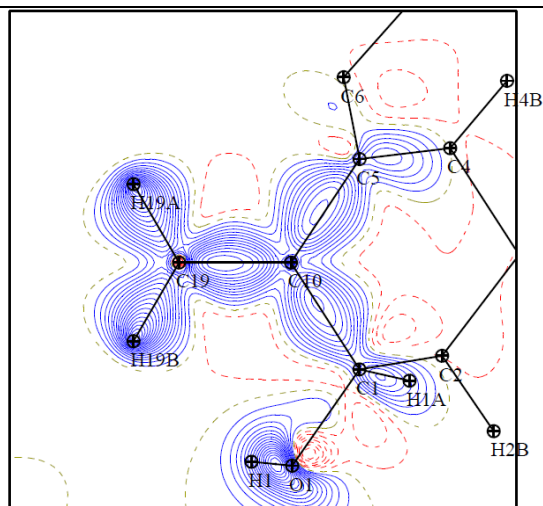

C19, C10, H19B

PRI-1730

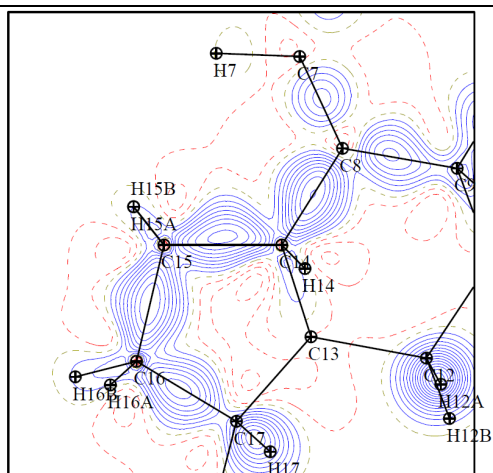

C15, C14, C16

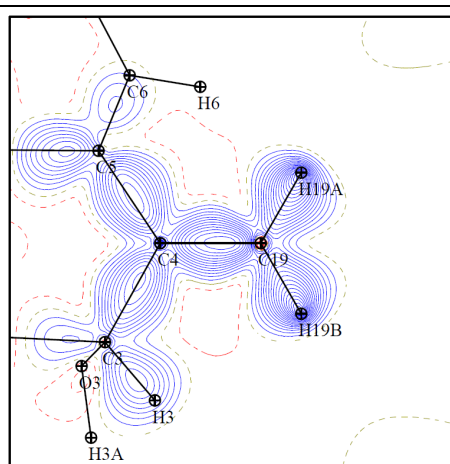

C19, C4, H19B

PRI-1731

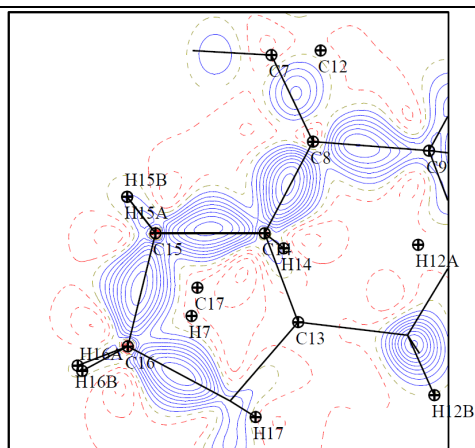

C15, C14, C16

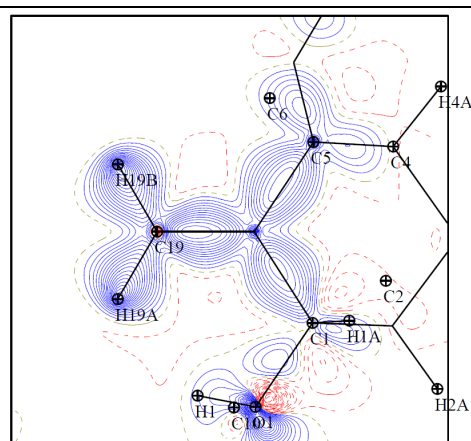

C19, C10, H19B

1,25(OH)<sub>2</sub>D<sub>3</sub>



**Figure S2** Deformation density maps for BNR1, Syn1G, PRI-1730 and PRI-1731. Maps are presented with contour levels with intervals of  $\pm 0.05\text{e}\text{\AA}^{-3}$ . Blue lines represent positive values and red lines negative values. Maps were prepared for planes determined by C15 (centre), C14 (x axis) and C16 (y axis) atoms or, excluding Syn1G, C19 (centre) C10 (x axis for BNR-1 and PRI-1730), C4 (x axis for PRI-1731) and H19B (y axis) atoms. Details are given below the maps.

## Energy frameworks:

Calculations of energy frameworks were performed using Crystal Explorer 3.3 (DFT methods, B3LYP functional, 6-31G(d,p) basis set). Results for all frameworks were presented using scale factor equal 50 and value of energy threshold equal 5 kJ/mol. View along X,Y and Z axis. Energy frameworks for PRI-1730 and PRI-1731 were previously published (Wanat *et al.*, 2018).

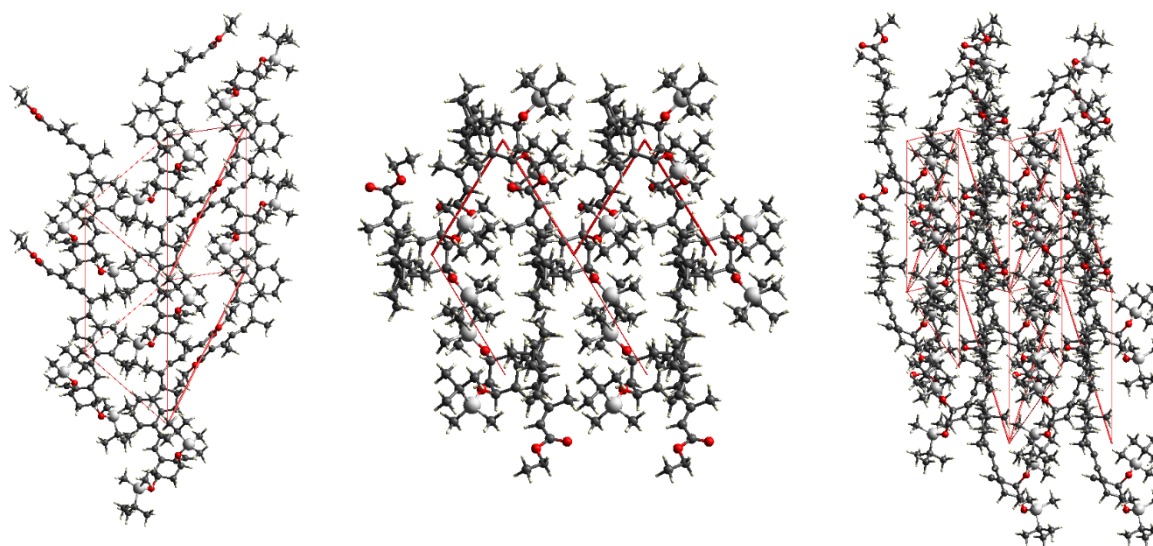

**Figure S3** Coulomb energy frameworks for BNR-1

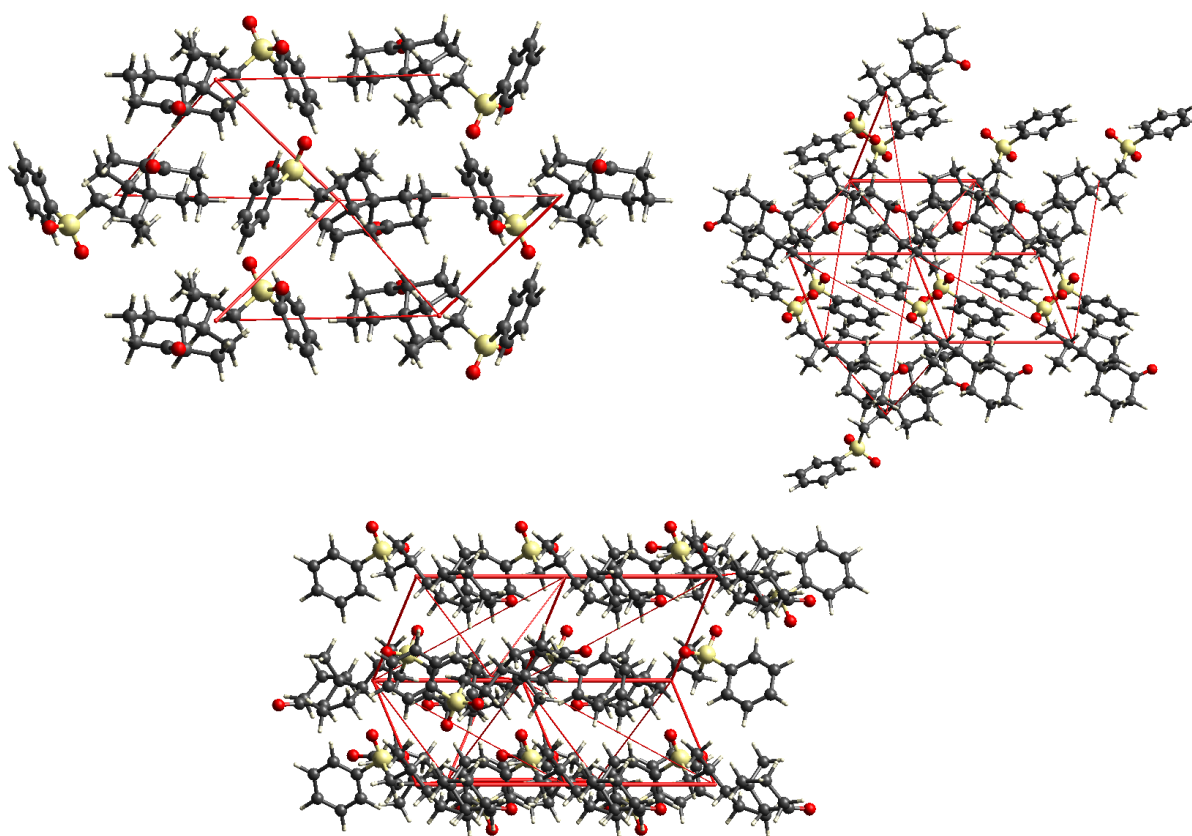

**Figure S4** Coulomb energy frameworks for Syn1G.

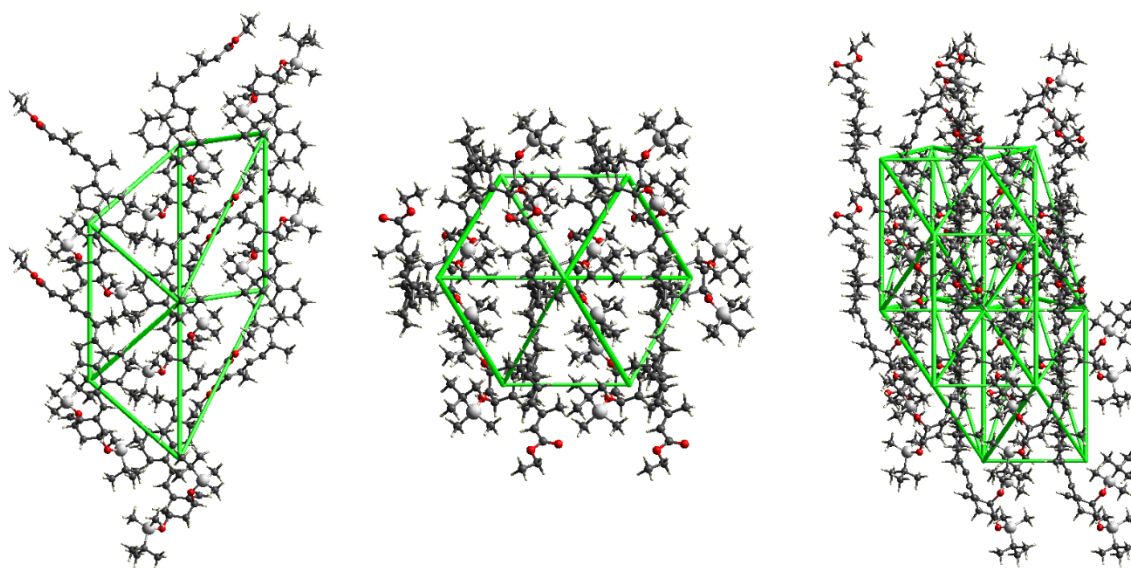

**Figure S5** Dispersion energy frameworks for BNR-1



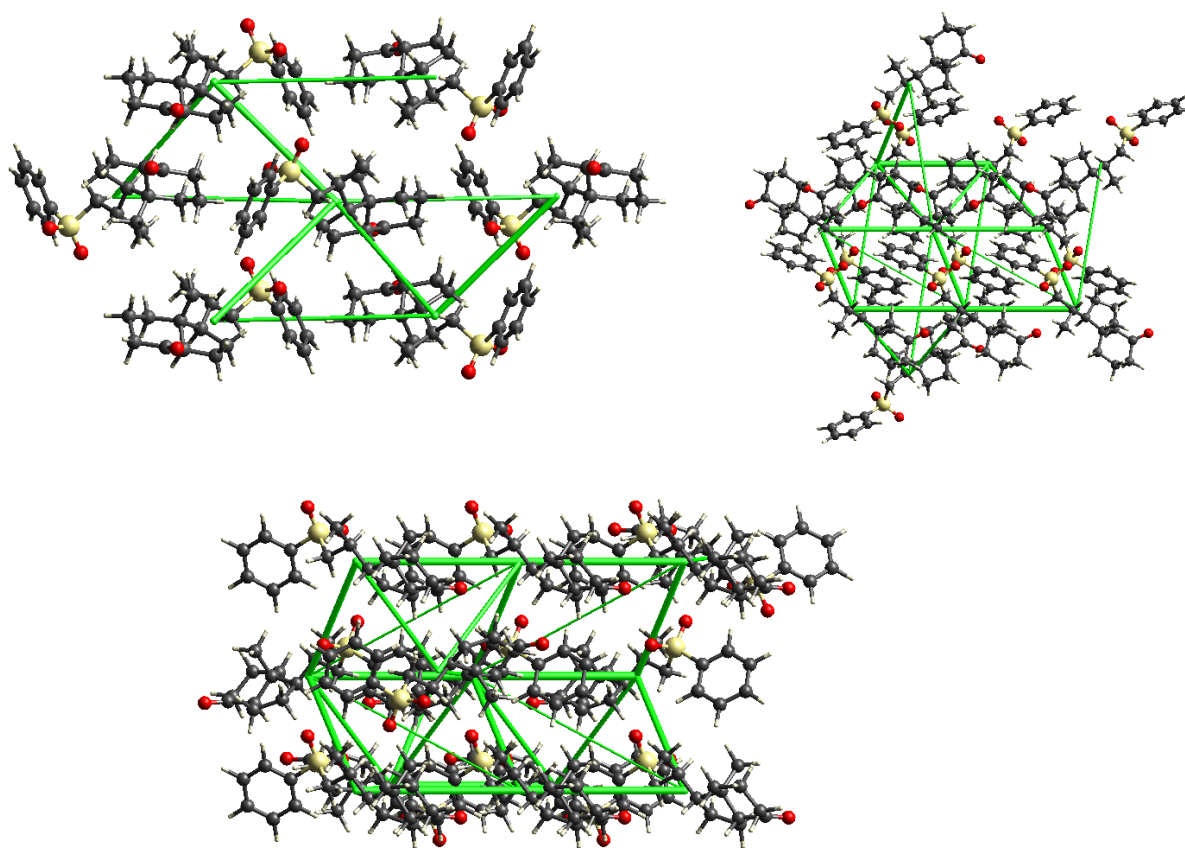

**Figure S6** Dispersion energy frameworks for Syn1G.

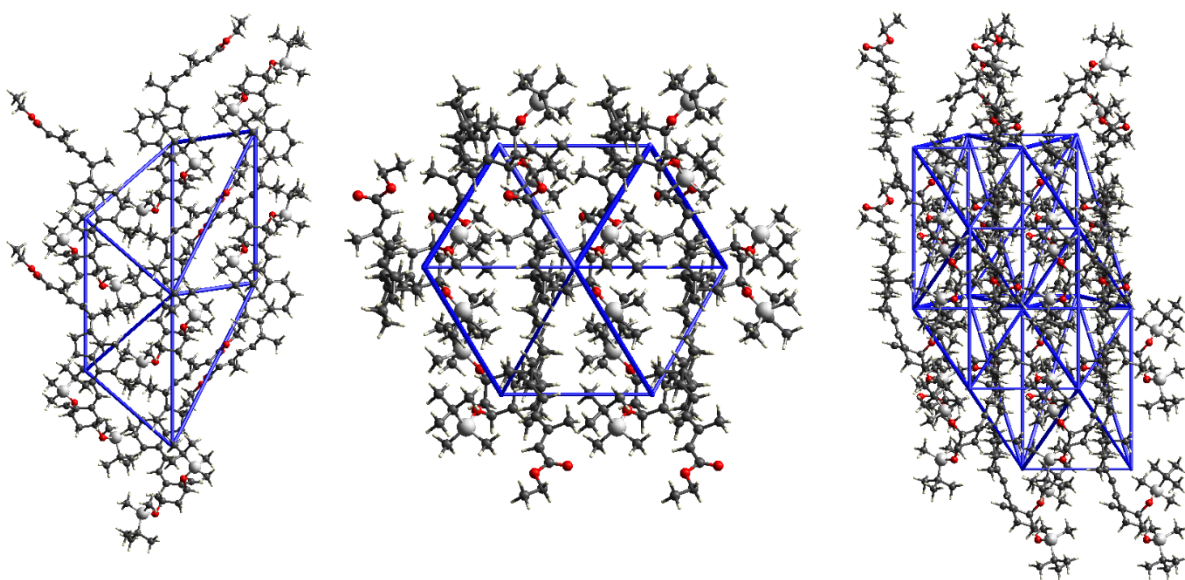

**Figure S7** Total energy frameworks for BNR-1

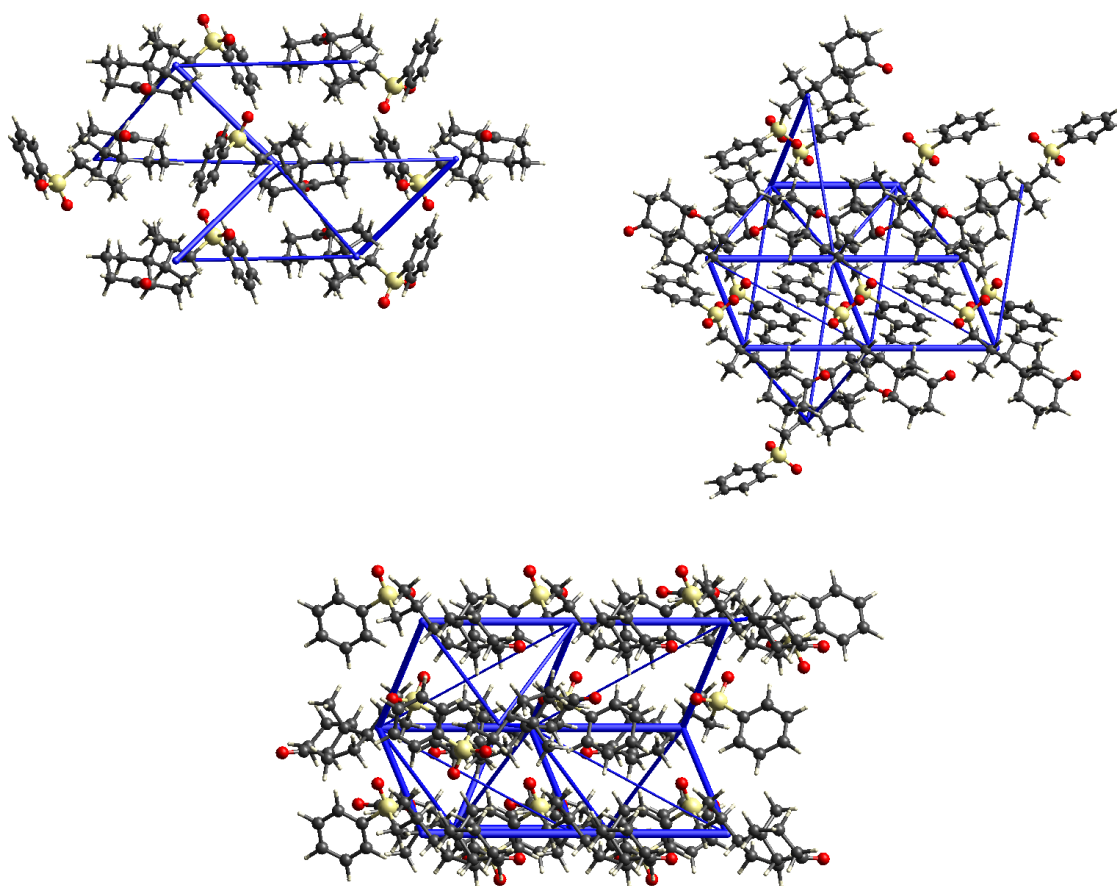

**Figure S8** Total energy frameworks for Syn1G.

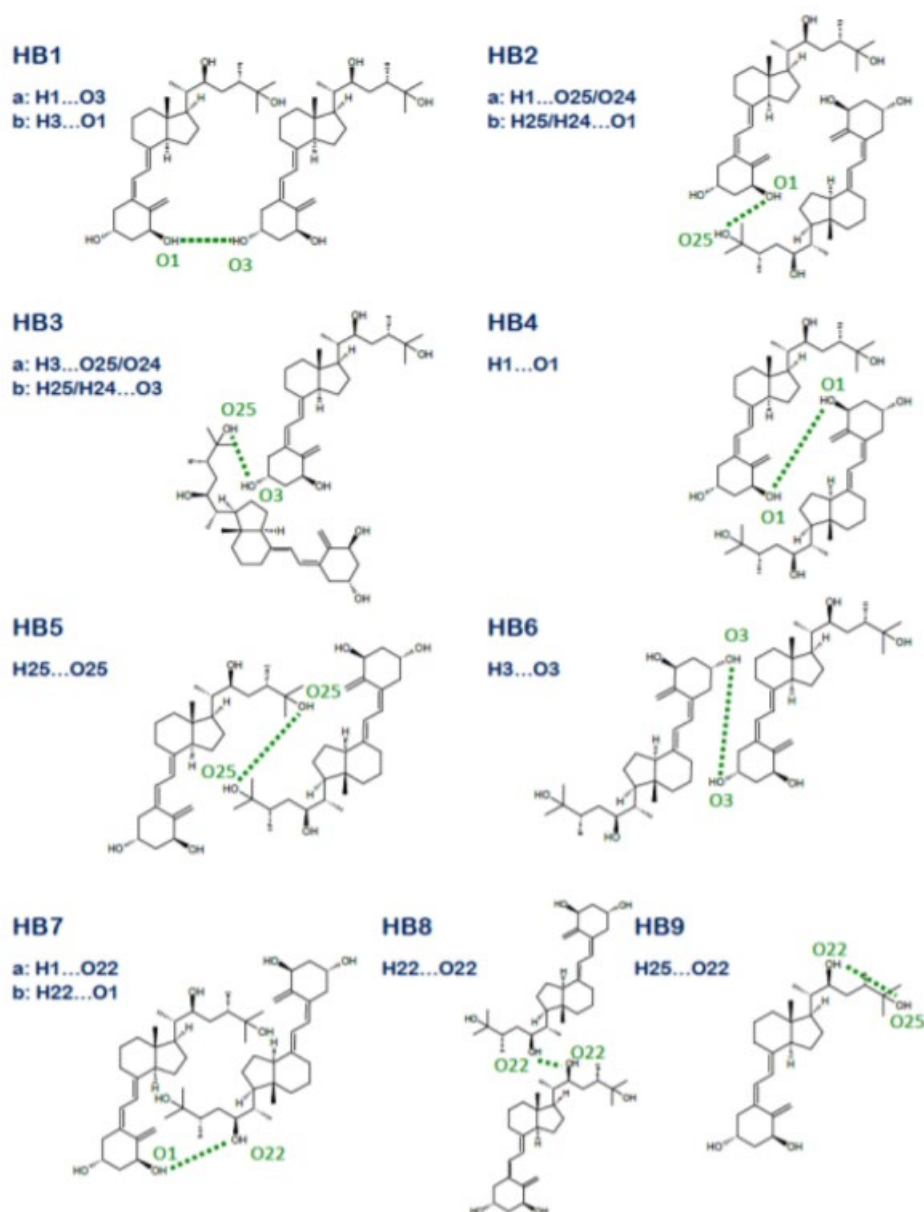

**Figure S9** Selected motifs found in vitamin D analogues. Reprinted with permission from Wanat, M., Malinska, M., Kutner, A., & Wozniak, K. (2018). Effect of vitamin D conformation on interactions and packing in the crystal lattice. *Crystal Growth & Design*, 18(6), 3385-3396. Copyright 2018 American Chemical Society.

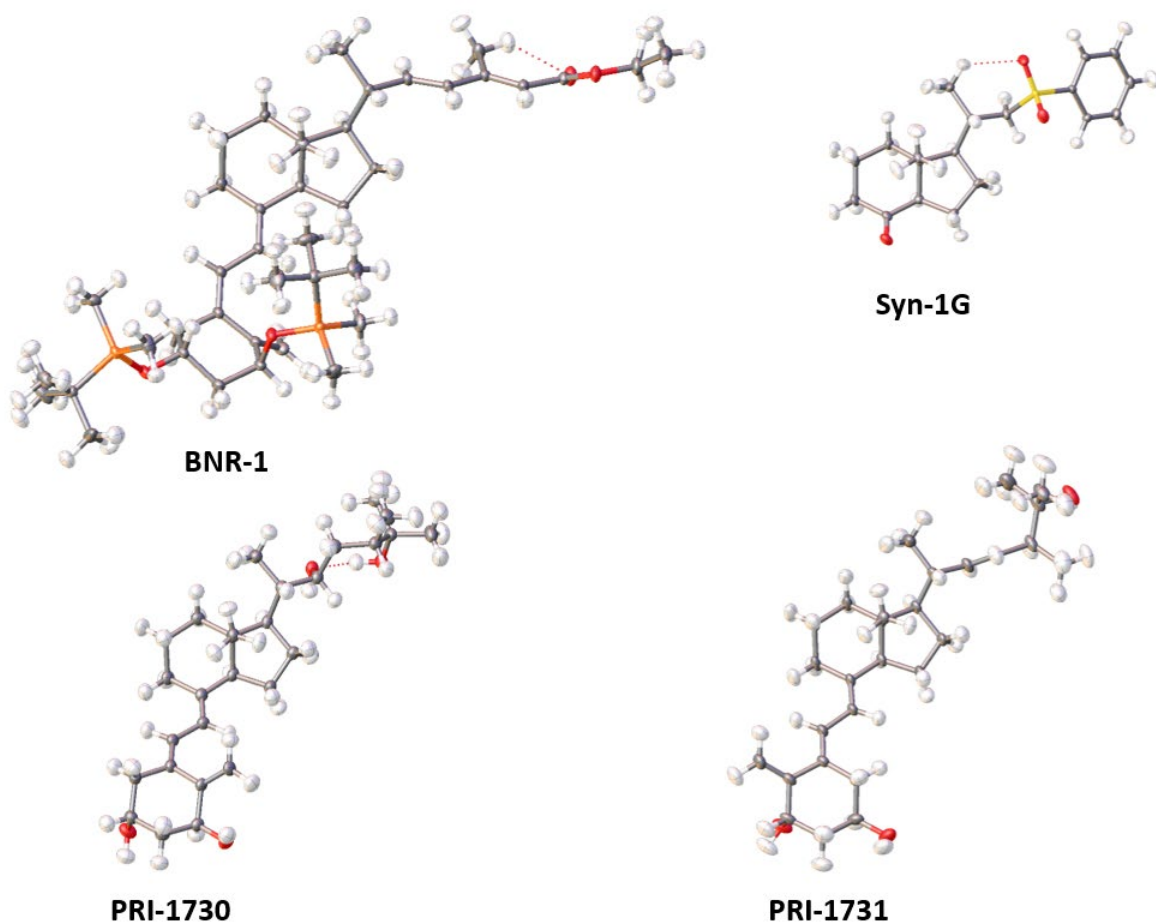

**Figure S10** Displacement ellipsoids (50% probability level) of the molecular structures obtained with the MM refinements of BNR-1 and Syn-1G and TAAM refinements of PRI-1730 and PRI-1731. Numbering system is omitted for clarity and available in ms.
